# Supplementary material for: Source–sink imbalance increases with growth temperature in the spring geophyte Erythronium americanum
Source: PubMed Central journal article supplement — J Exp Bot. 2011 Feb 18;62(10):3467–79. doi: 10.1093/jxb/err020 (PMC3130172; doi:10.1093/jxb/err020), 2011-02-18
Supplement: supp_err020_00055491-file001.pdf [file supp_err020_00055491-file001.pdf]

Source-sink imbalance increases with growth temperature in the spring geophyte *Erythronium americanum*. A Gandin, S Gutjahr, P Dizengremel, and L Lapointe

## SUPPLEMENTARY DATA

**Table S1.** Effects of growth temperature on the rates of change through time and on either maximum or minimum values reached for different parameters related to growth, gas exchange, chlorophyll fluorescence, bulb carbohydrates and enzyme activities in *Erythronium americanum*. Rates of change were estimated from the slope of linear regressions. F-values of one-way ANOVAs are presented along with statistical differences: \*  $P < 0.05$ , \*\*  $P < 0.01$ , \*\*\*  $P < 0.001$ .

| Variables                            | Comparisons of slopes from linear regressions |                | ANOVAs on maximal or minimal values <sup>1</sup> | Days when maxima or minima were reached |        |       |
|--------------------------------------|-----------------------------------------------|----------------|--------------------------------------------------|-----------------------------------------|--------|-------|
|                                      | Positive slope                                | Negative slope |                                                  | 18/14°C                                 | 12/8°C | 8/6°C |
| <b>Growth parameters</b>             |                                               |                |                                                  |                                         |        |       |
| Bulb DW                              | 70.54 ***                                     | -              | 444.58 ***                                       | 17                                      | 29     | 29    |
| Leaf DW                              | 0.10                                          | 1.92           | 6.37 **                                          | 11                                      | 13     | 17    |
| Root DW                              | -                                             | 1.47           | 0.62                                             | 7                                       | 10     | 9     |
| Leaf area                            | 0.65                                          | -              | 98.47 ***                                        | 11                                      | 22     | 29    |
| Bulb cell size                       | 32.44                                         | -              | 76.21 ***                                        | 11                                      | 16     | 25    |
| <b>Gas exchange and fluorescence</b> |                                               |                |                                                  |                                         |        |       |
| Pn 400                               | 7.03 **                                       | 10.31 ***      | 77.88 ***                                        | 9                                       | 13     | 21    |
| g <sub>s</sub> 400                   | 7.48 **                                       | 9.56 **        | 8.43 ***                                         | 11                                      | 19     | 21    |
| Ci 400                               | 0.34                                          | -              | -                                                | -                                       | -      | -     |
| Pn 1000                              | 12.29 ***                                     | 10.51 ***      | 23.28 ***                                        | 9                                       | 13     | 21    |
| g <sub>s</sub> 1000                  | 0.48                                          | 7.42           | 0.86                                             | 9                                       | 19     | 29    |
| Ci 1000                              | 0.47                                          | -              | -                                                | -                                       | -      | -     |
| Rd                                   | -                                             | -              | 0.39                                             | -                                       | -      | -     |
| qP 400                               | -                                             | 37.04 ***      | 125.20 ***                                       | 9                                       | 13     | 29    |
| qN 400                               | 2.75 **                                       | -              | 2.34 *                                           | 9                                       | 13     | -     |
| Fv/Fm                                | 0.50                                          | 8.94 ***       | 11.79 ***                                        | 13                                      | 13     | 24    |
| ΦPS2                                 | 6.76 **                                       | 9.48 ***       | 17.12 ***                                        | 9                                       | 13     | 21    |
| PR                                   | -                                             | 6.39 ***       | 10.86 ***                                        | 7                                       | 10     | 13    |
| <b>Bulb carbohydrates</b>            |                                               |                |                                                  |                                         |        |       |
| Starch                               | 12.02 ***                                     | -              | 0.169                                            | 15                                      | 22     | 29    |
| Sucrose                              | -                                             | 1.17 *         | 7.49 ***                                         | 7                                       | 19     | 29    |
| Reducing sugars                      | 0.54                                          | 0.83           | 0.18                                             | 3                                       | 4      | 5     |
| Sucrose (starchless)                 | 7.43*                                         | 2.45*          | 8.61 *                                           | 22                                      | 22     | 29    |
| Red. sugars (starchless)             | 1.76                                          | 0.19           | 23.92 **                                         | 15                                      | 22     | 29    |
| Amylose                              | 0.98                                          | 0.66           | 4.30 *                                           | 15                                      | 25     | 33    |

Days at which either a maximum or minimum value was reached are also presented.

Table S1. (continued)

| Variables                 | Comparisons of slopes from linear regressions |                | ANOVAs on maximal or minimal values <sup>1</sup> | Days when maxima or minima were reached |        |       |
|---------------------------|-----------------------------------------------|----------------|--------------------------------------------------|-----------------------------------------|--------|-------|
|                           | Positive slope                                | Negative slope |                                                  | 18/14°C                                 | 12/8°C | 8/6°C |
| <b>Leaf carbohydrates</b> |                                               |                |                                                  |                                         |        |       |
| Sucrose                   | 5.83**                                        | 0.16           | 0.97                                             | 15                                      | 25     | 33    |
| Reducing sugars           | 1.27                                          | -              | 2.12                                             | 9                                       | 13     | 17    |
| <b>Enzymes</b>            |                                               |                |                                                  |                                         |        |       |
| F1,6BPase                 | -                                             | 0.77           | 36.70 ***                                        | 17                                      | 25     | 33    |
| AGPase                    | 2.05                                          | -              | 0.63                                             | 7                                       | 10     | 17    |
| Susy                      | 89.14 ***                                     | -              | 3.27 *                                           | 13                                      | 22     | 33    |
| Cell wall invertase       | -                                             | 8.36 ***       | 0.88                                             | -                                       | -      | -     |
| Neutral invertase         | 4.84 *                                        | 1.82           | 9.87 **                                          | 7                                       | 10     | 13    |
| Vacuolar invertase        | 1.11                                          | 0.09           | 23.59 ***                                        | 7                                       | 16     | 29    |
| SPS                       | 0.38                                          | -              | 32.94 ***                                        | 13                                      | 22     | 29    |
| Leaf protein              | -                                             | 2.98           | 0.67                                             | -                                       | -      | -     |
| Bulb protein              | 1.62                                          | 0.96           | 1.87                                             | 15                                      | 22     | 21    |

<sup>1</sup>ANOVAs were carried out on maximum values of each variable to compare among growth temperatures, except for the following variables: Root DW, Rd, qN, Sucrose, Reducing sugars and Bulb protein where ANOVAs were carried out on minimum values. When there was no obvious peak or plateau, only comparisons of rates of change were performed and vice versa.
